# Supplementary material
Source: publisher figshare collection journal article supplement (https://tandf.figshare.com/ndownloader/files/20160746)
Supplement: Supplementary file 1 [file 20160746]

Transition Metal Complexes of α-Aminophosphonates Part II: Synthesis, Spectroscopic Characterization and In Vitro Anticancer Activity of Copper(II) Complexes of α-Aminophosphonates

Mariam Ahmed Azzam1*, Hanaa Abdel Latif El-Boraey2, Ibrahim El Tantawy El Sayed2

1Applied Organic Chemistry Department, National Research Centre, Dokki, Giza, Egypt

2Chemistry Department, Faculty of Science, El-Menoufia University, Shebin El Koom, Egypt

Email: [mariam_ahmed_987@yahoo.com](mailto:mariam_ahmed_987@yahoo.com)

**Supplemental Materials**


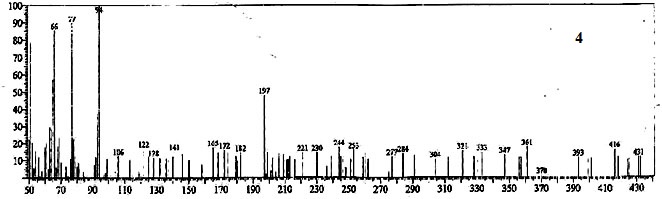


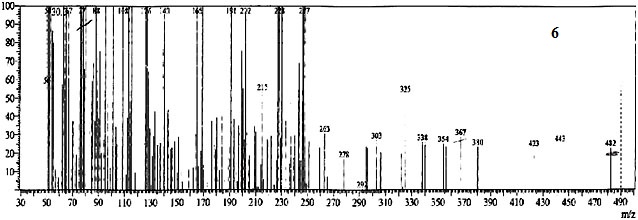


**Figure S 1:** The electron impact (EI) mass spectra of the free ligands **4, 6**.


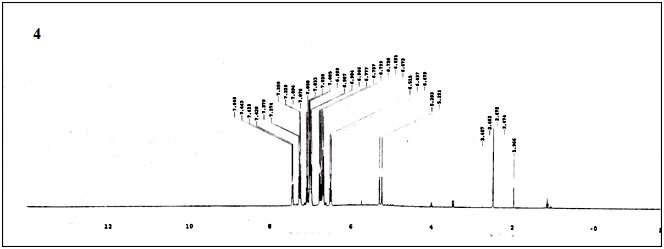


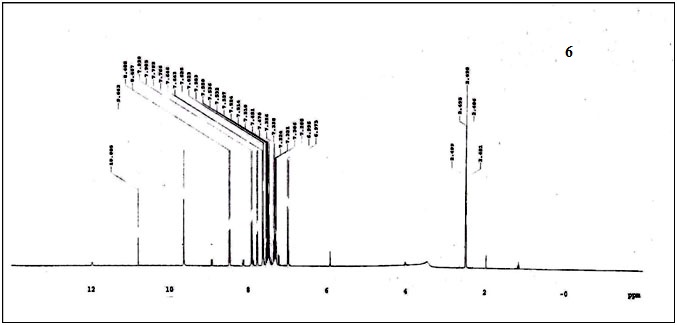


**Figure S 2:** The 1H NMR spectra of the free ligands **4, 6**.


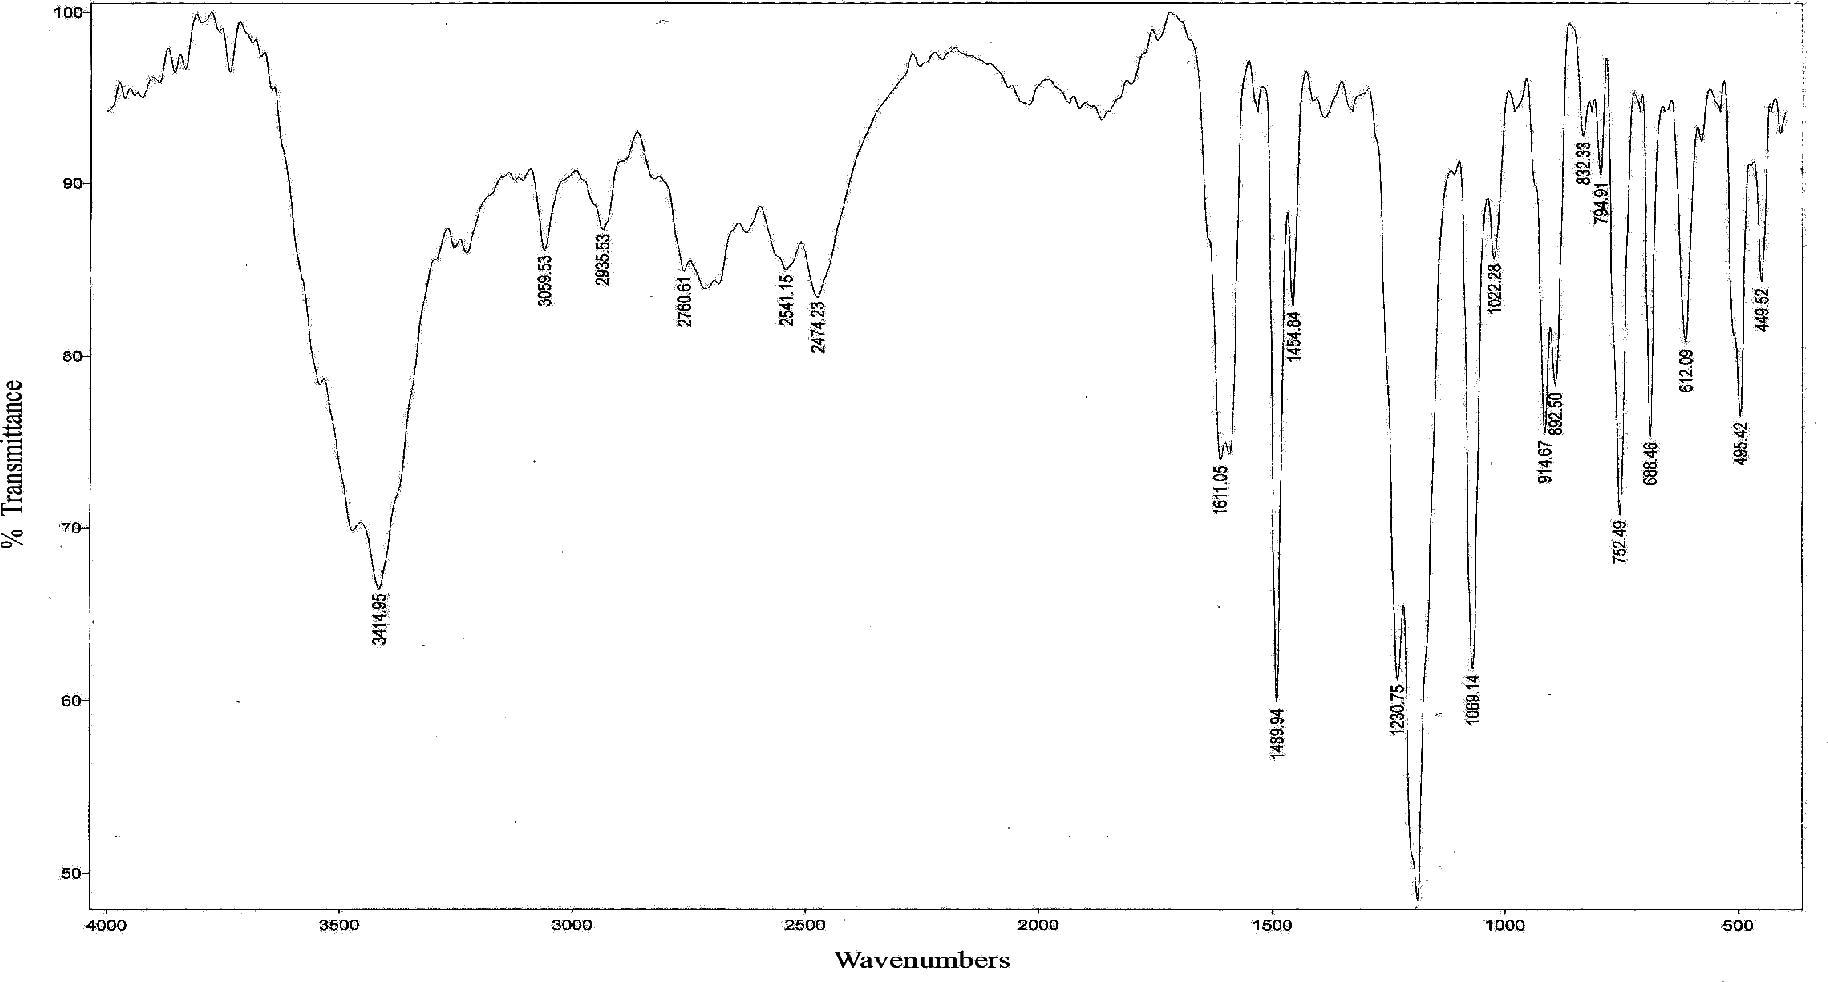
 **4**

**
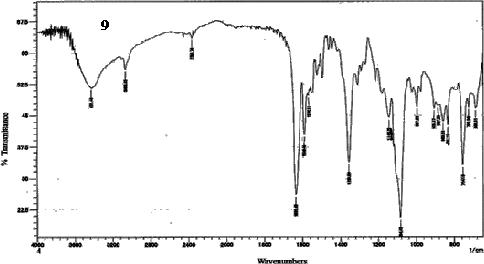
**

**6**

**Figure S 3:** The IR spectra of the free ligands**4, 6**.


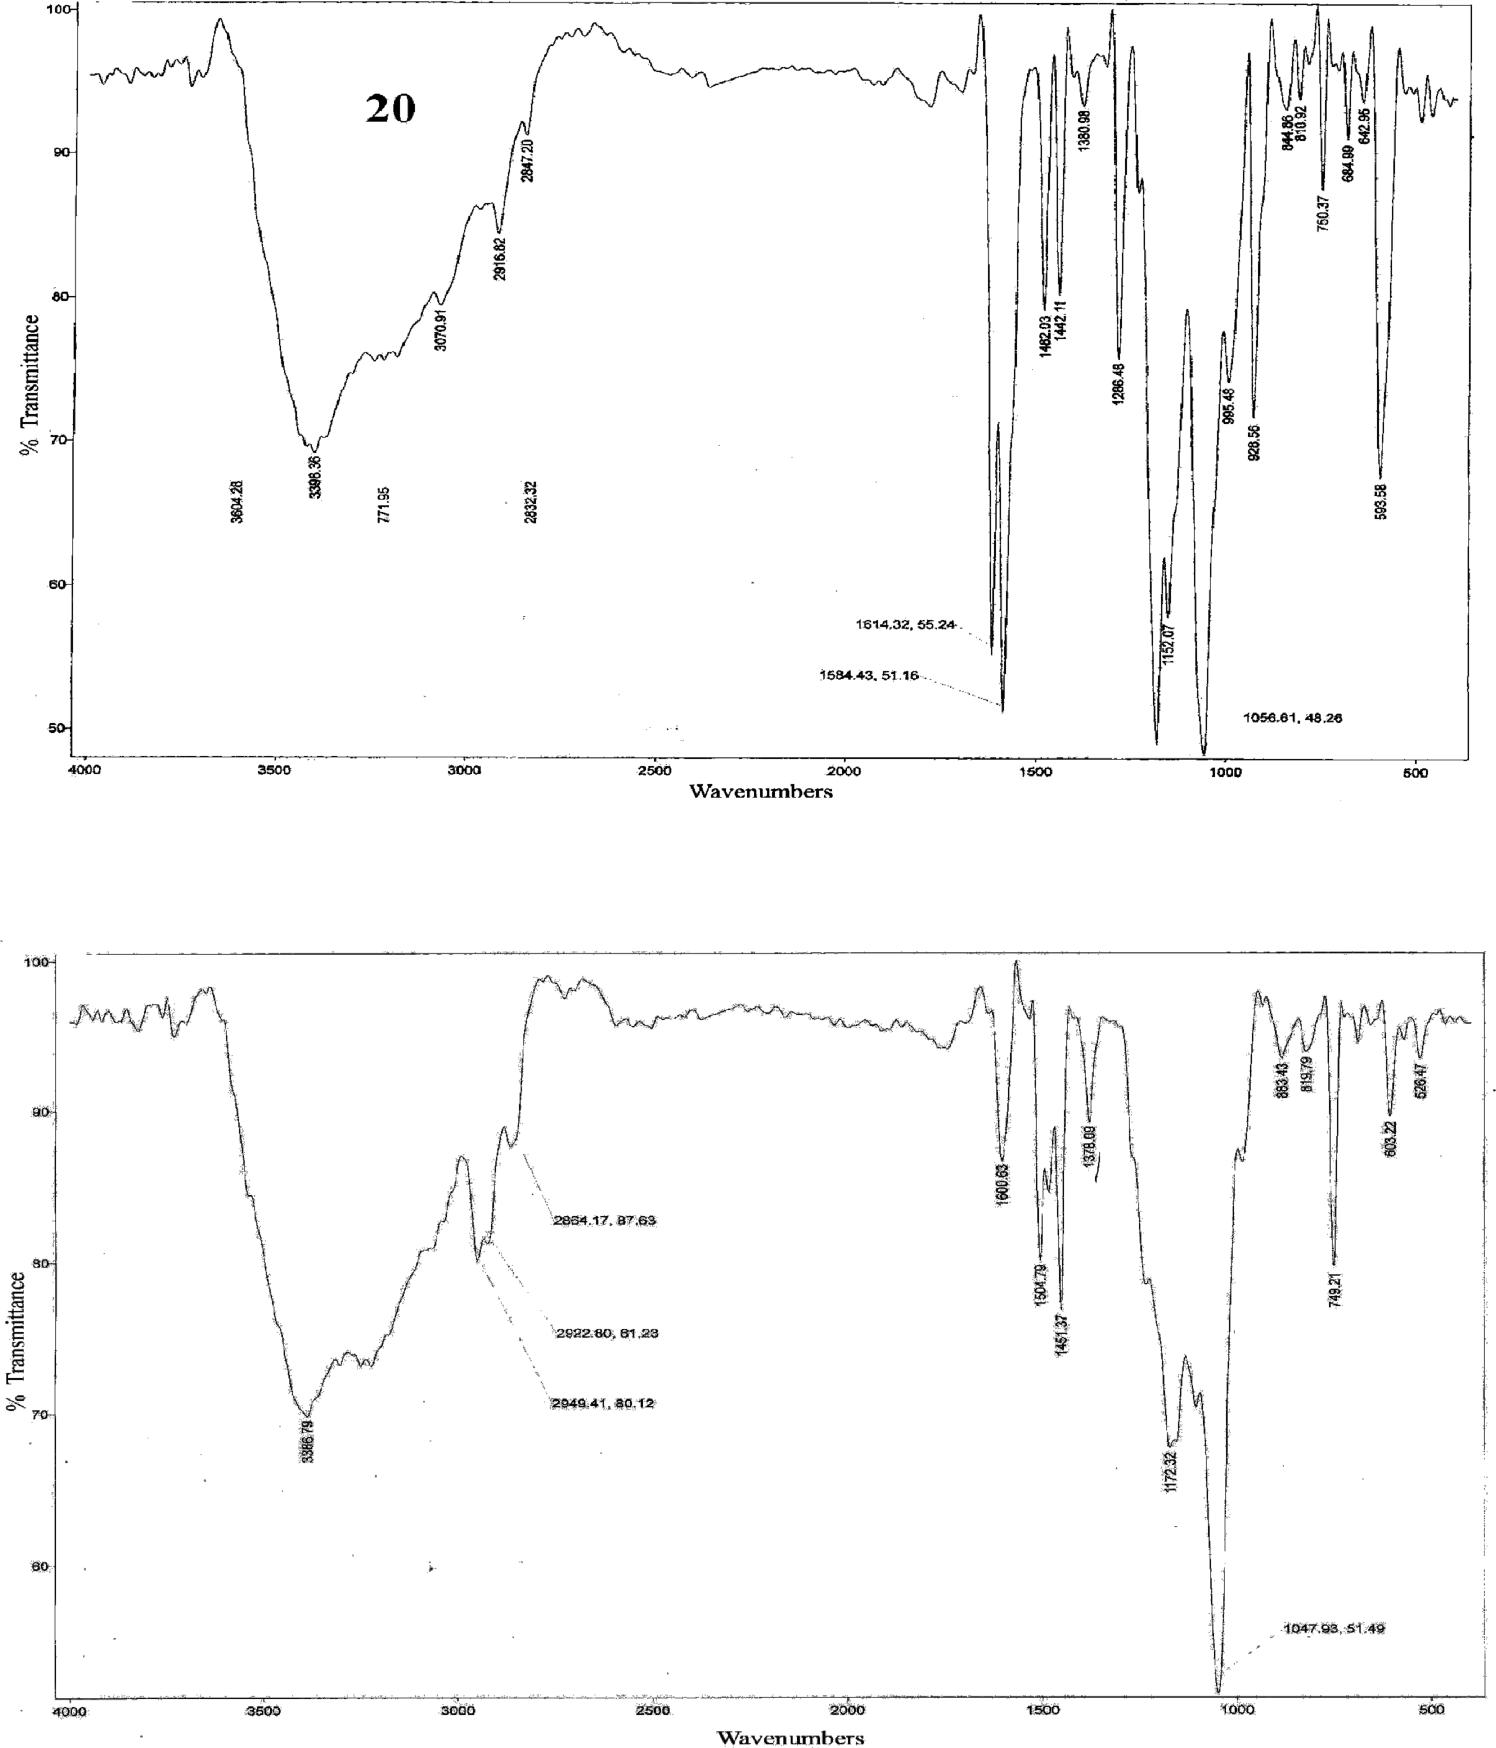


**5a**

**5b**

**Figure S 4:** The IR spectra of the copper(II) complexes **5a, 5b**.


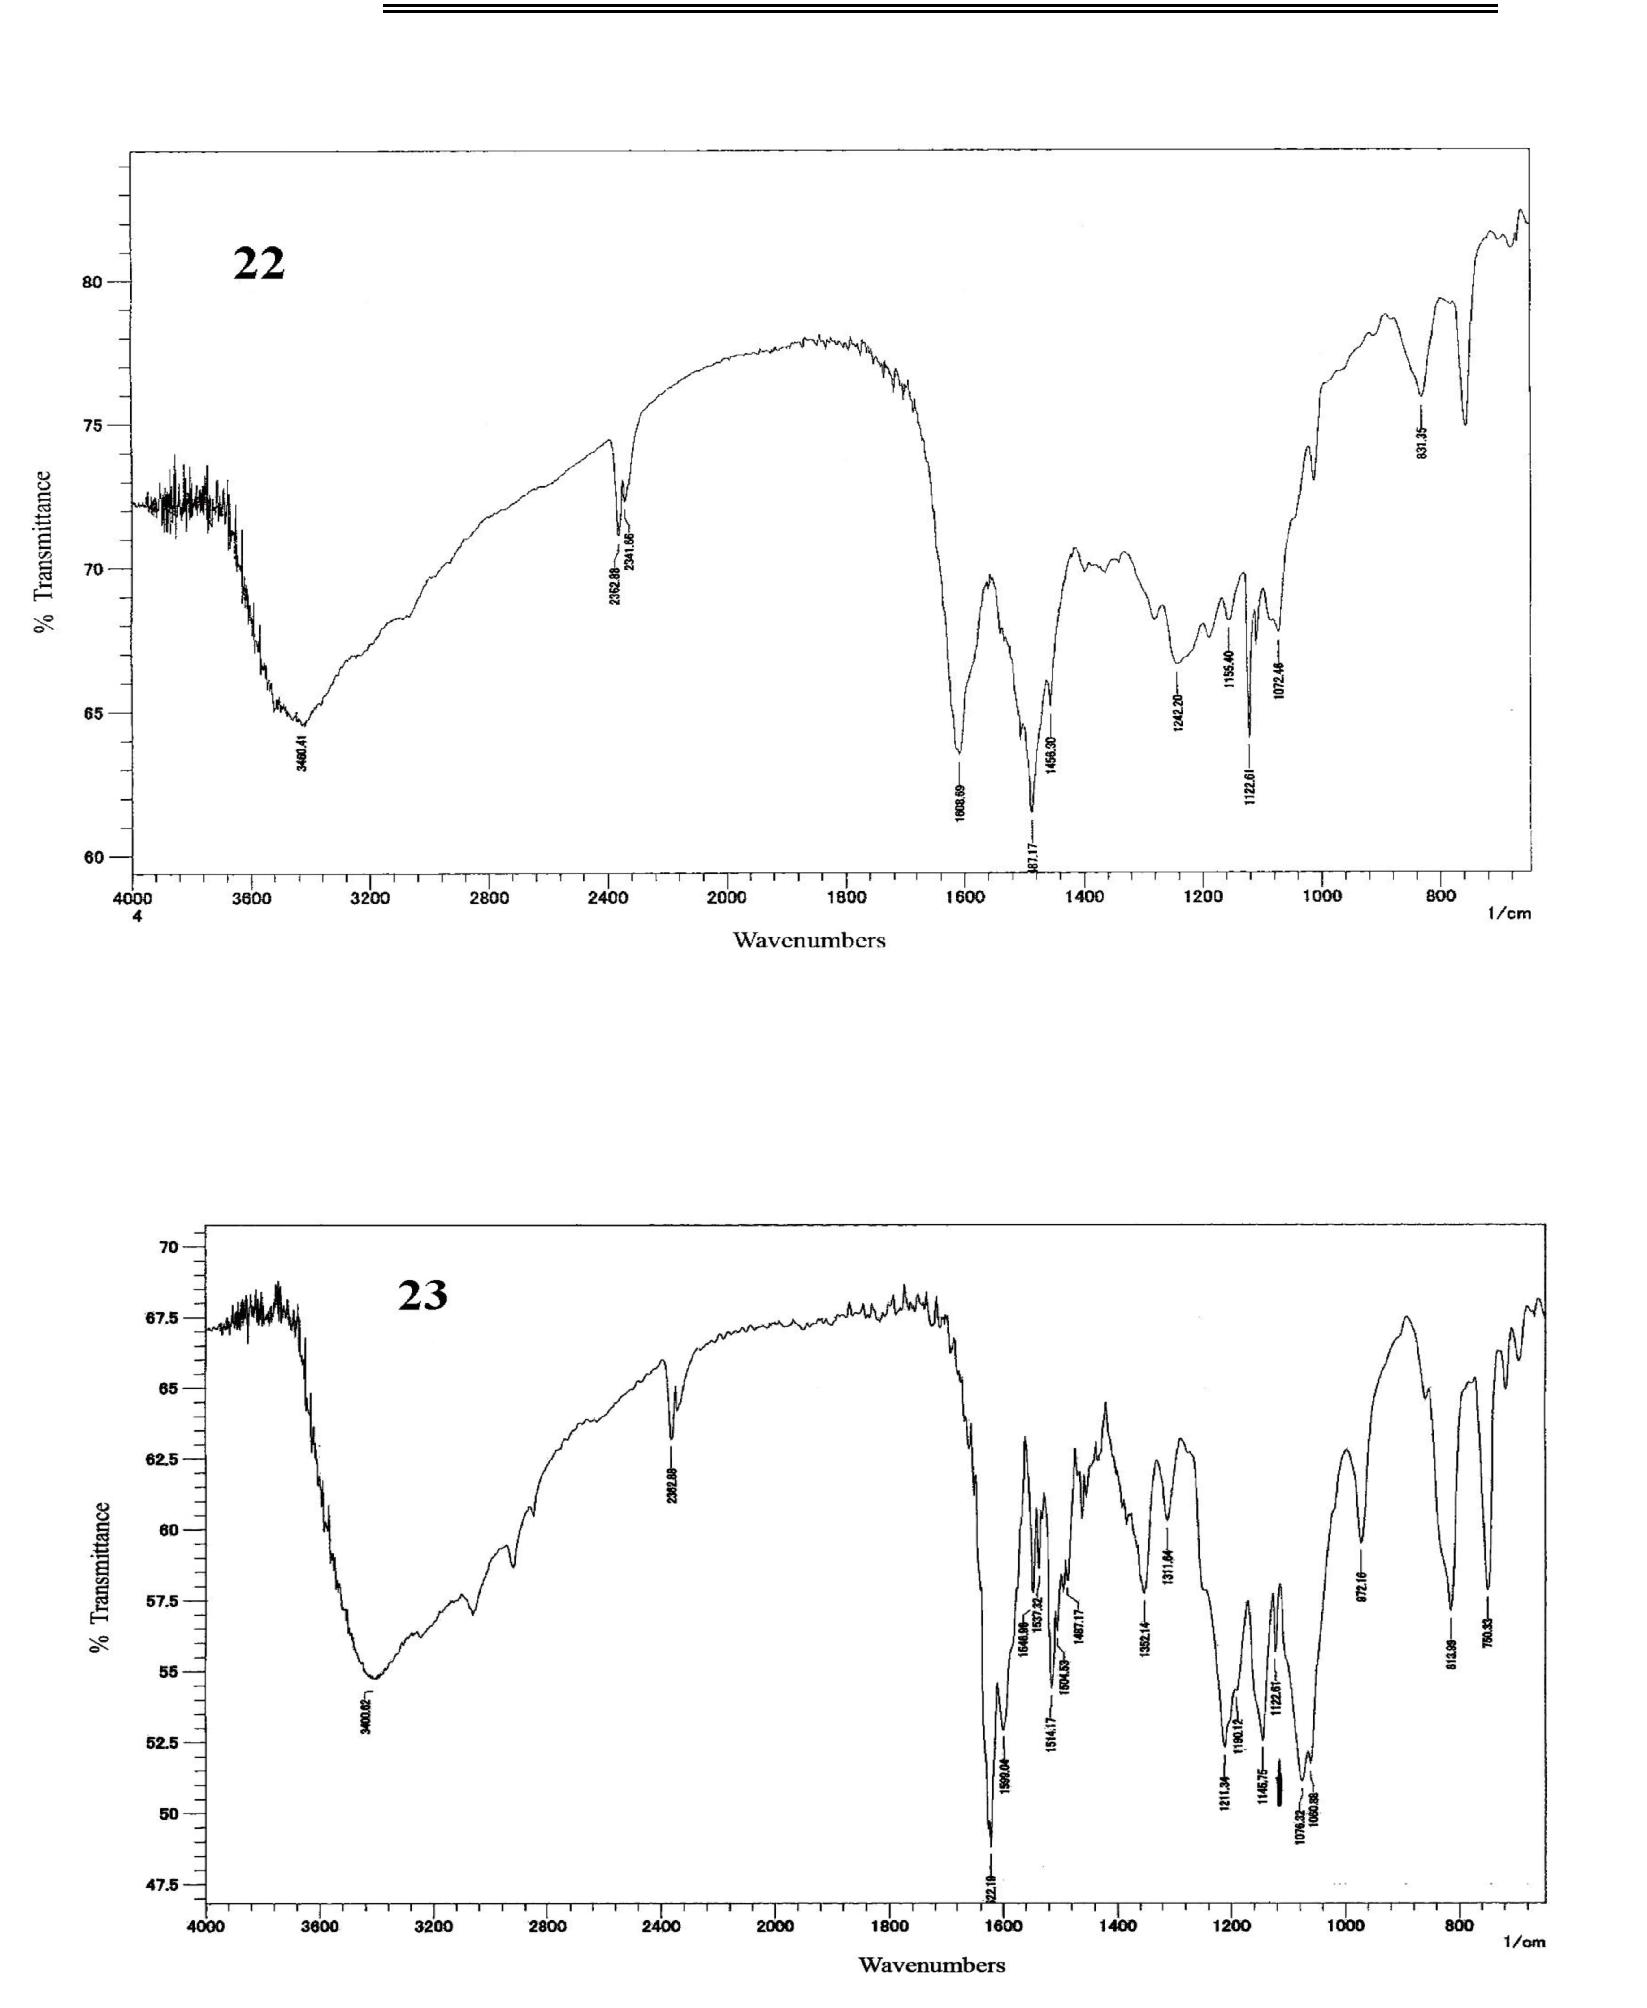


**5c**

**7a**

**Figure S 5:** The IR spectra of the copper(II) complexes **5c, 7a.**


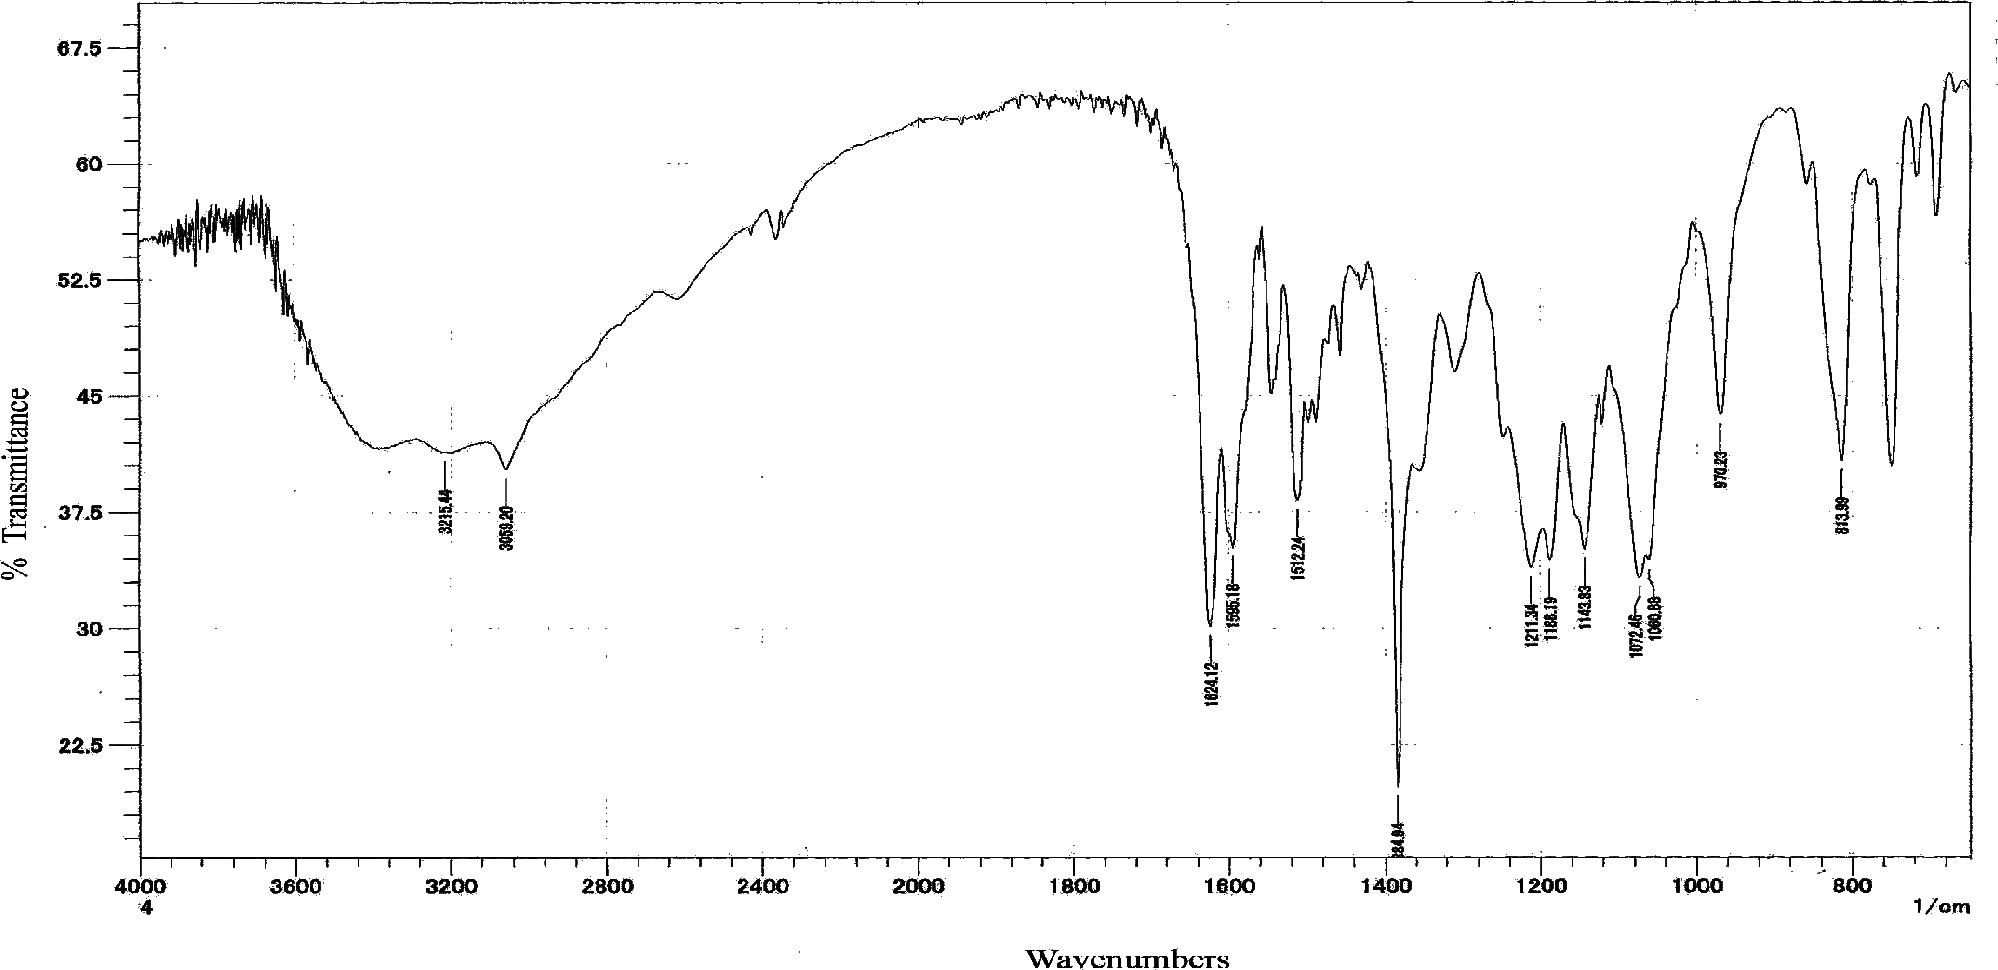


**7b**


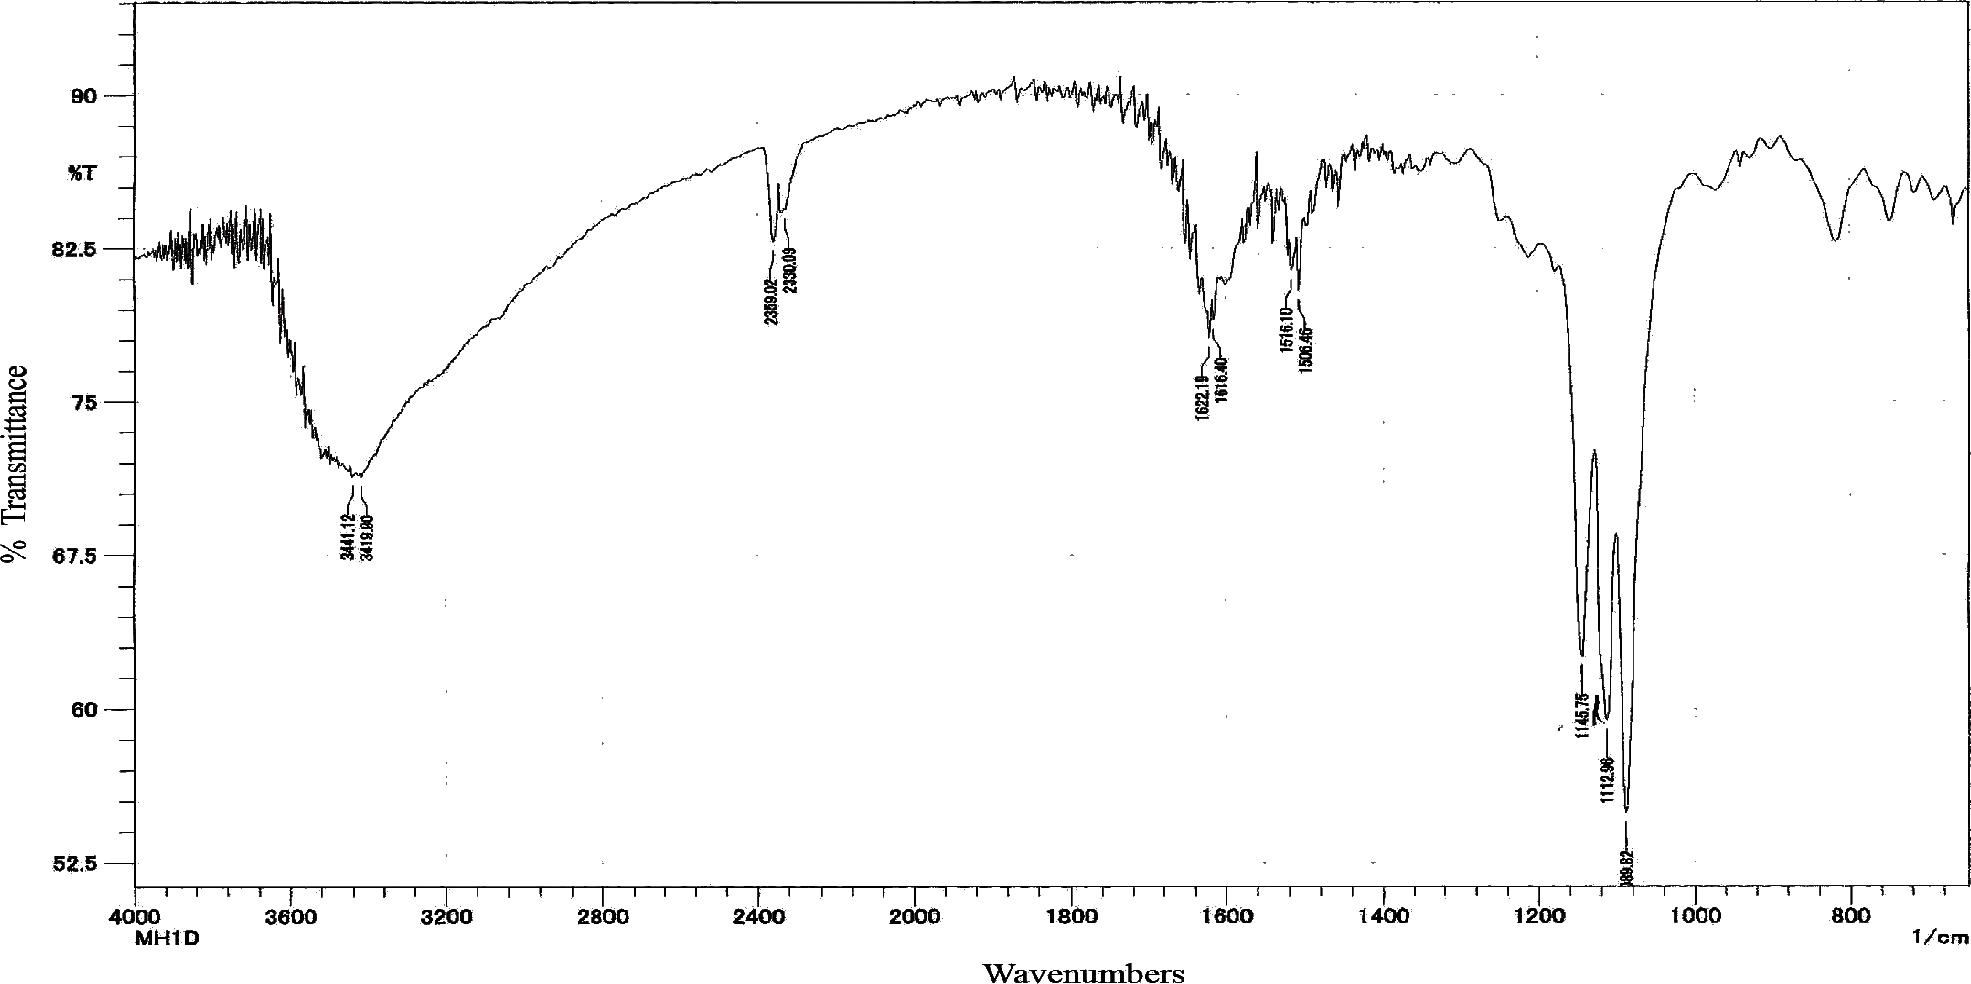


**7c**

**Figure S 6:** The IR spectra of the copper(II) complexes **7b, 7c.**


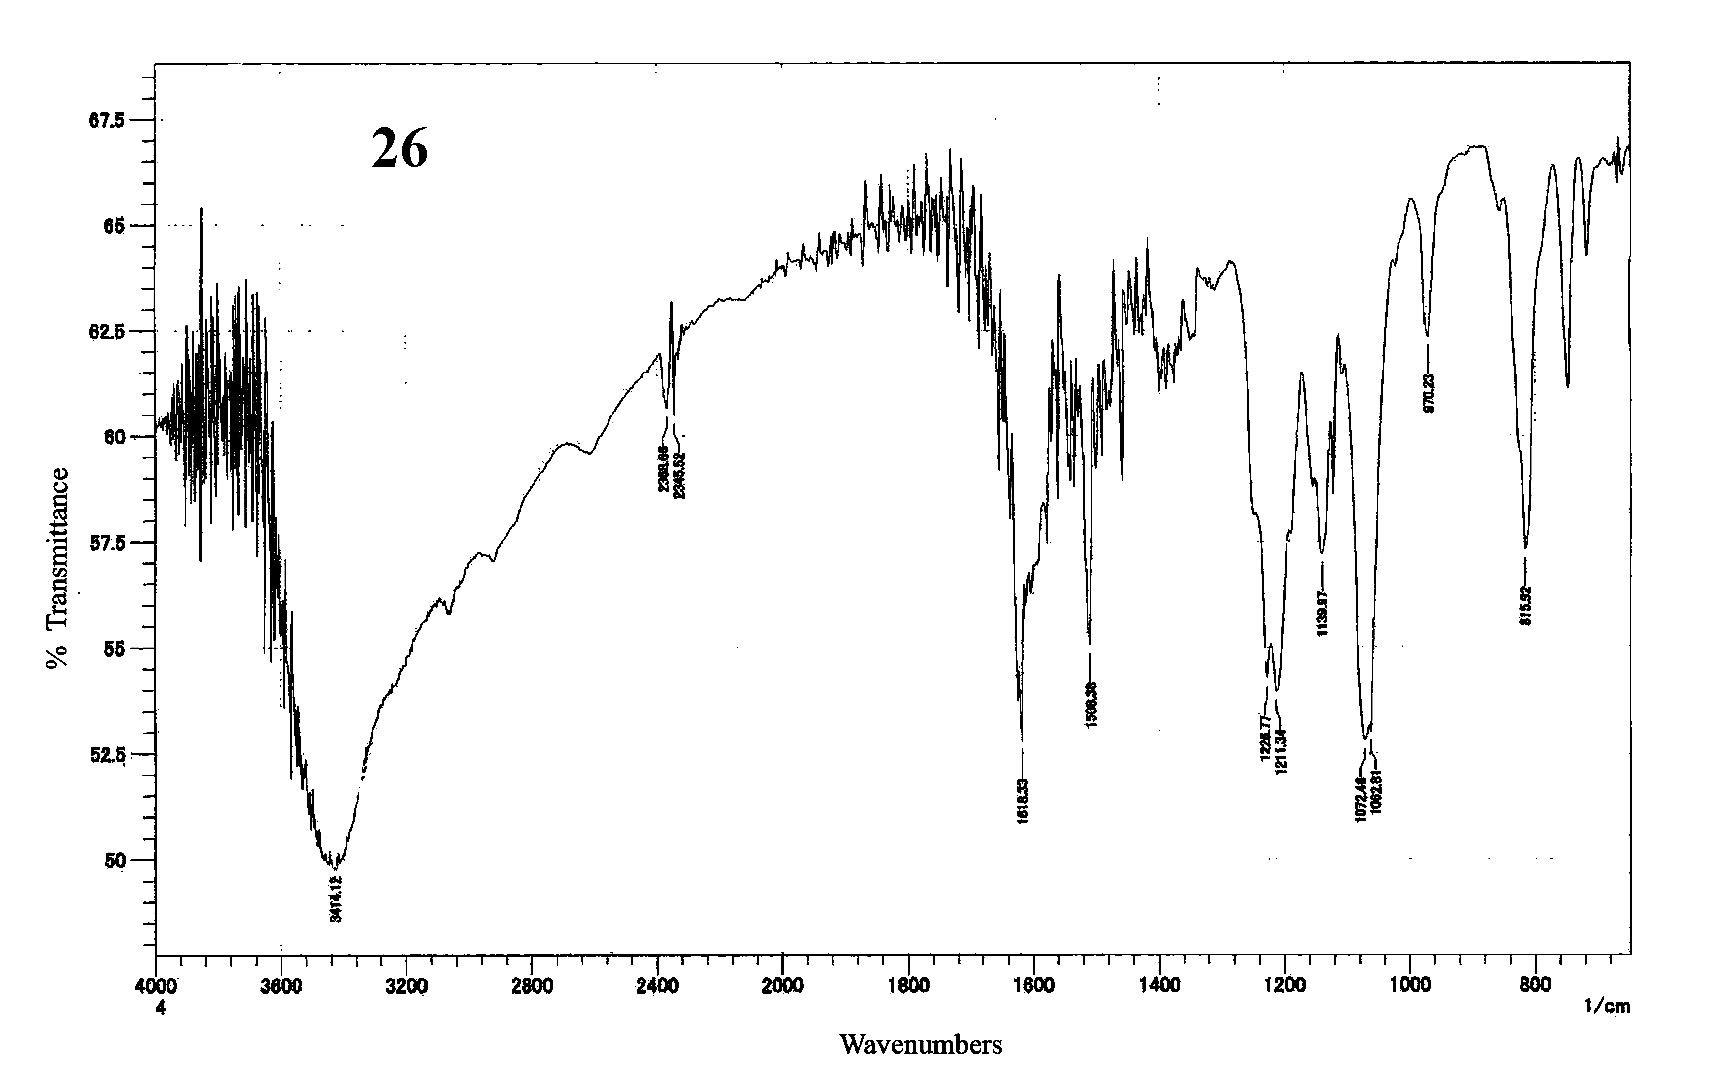


**7d**

**Figure S 7:** The IR spectra of the copper(II) complex **7d**.


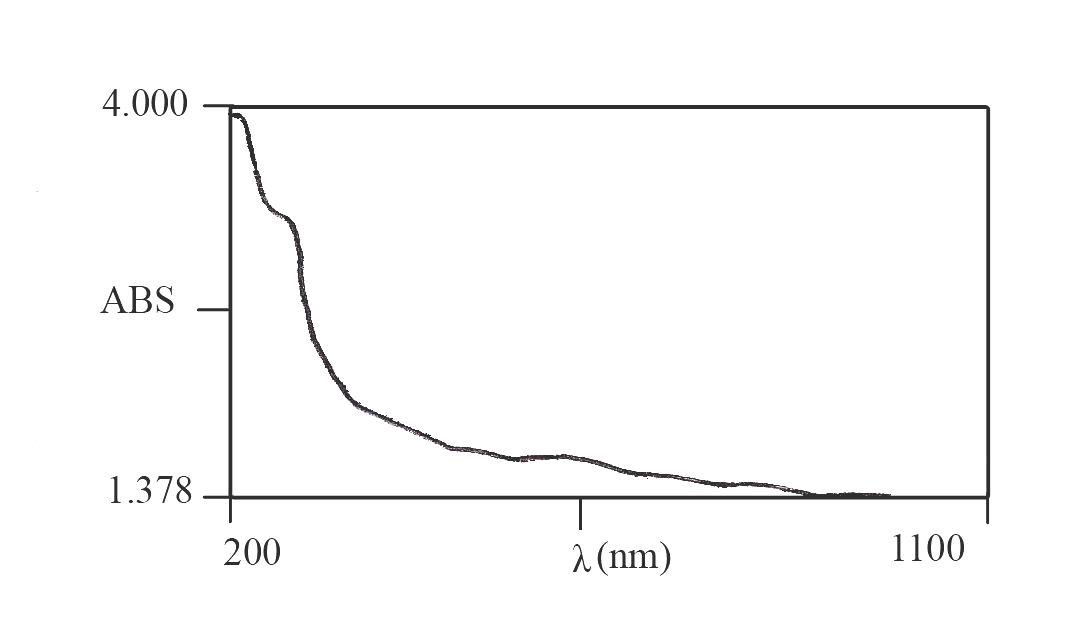


**4**


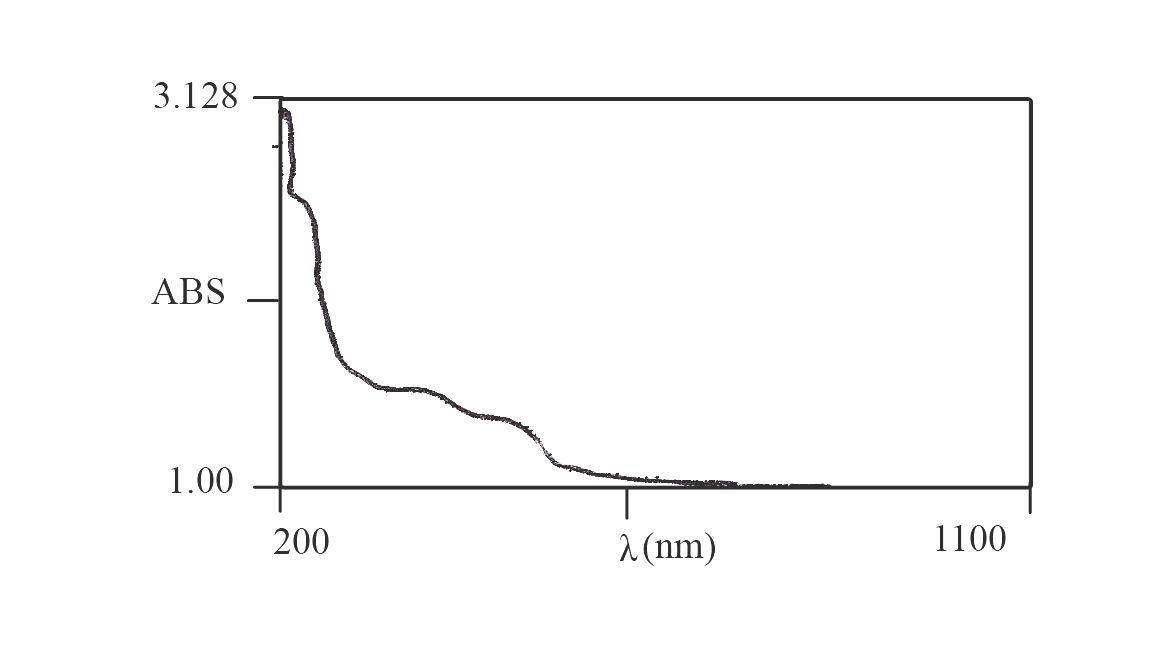


**6**

**Figure S 8:** The UV spectra of the ligands **4, 6.**


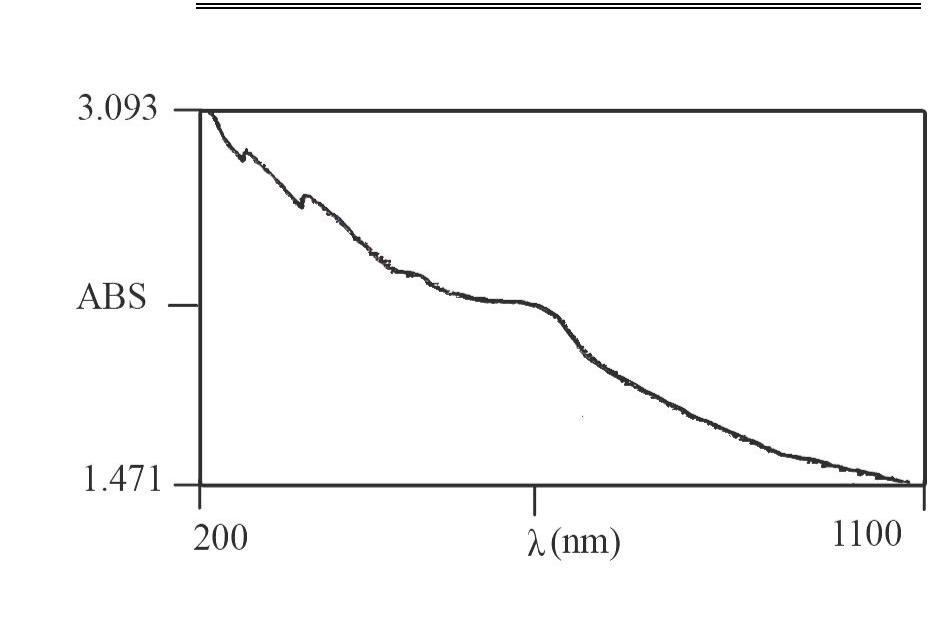


**5a**


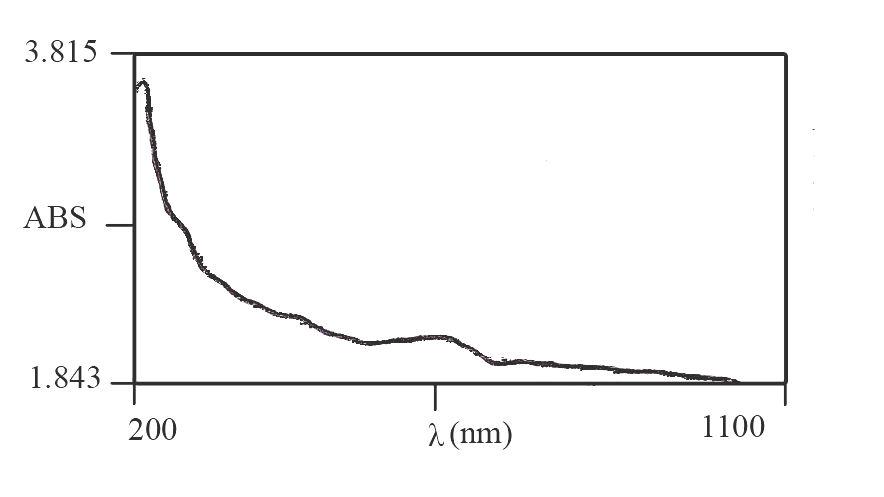


**5b**

**Figure S 9:** The UV spectra of the copper(II) complexes **5a, 5b.**


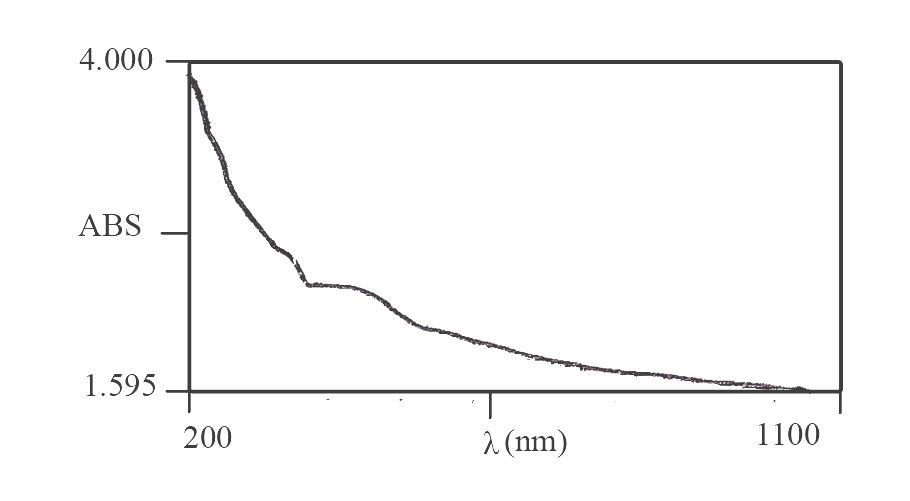


**5c**


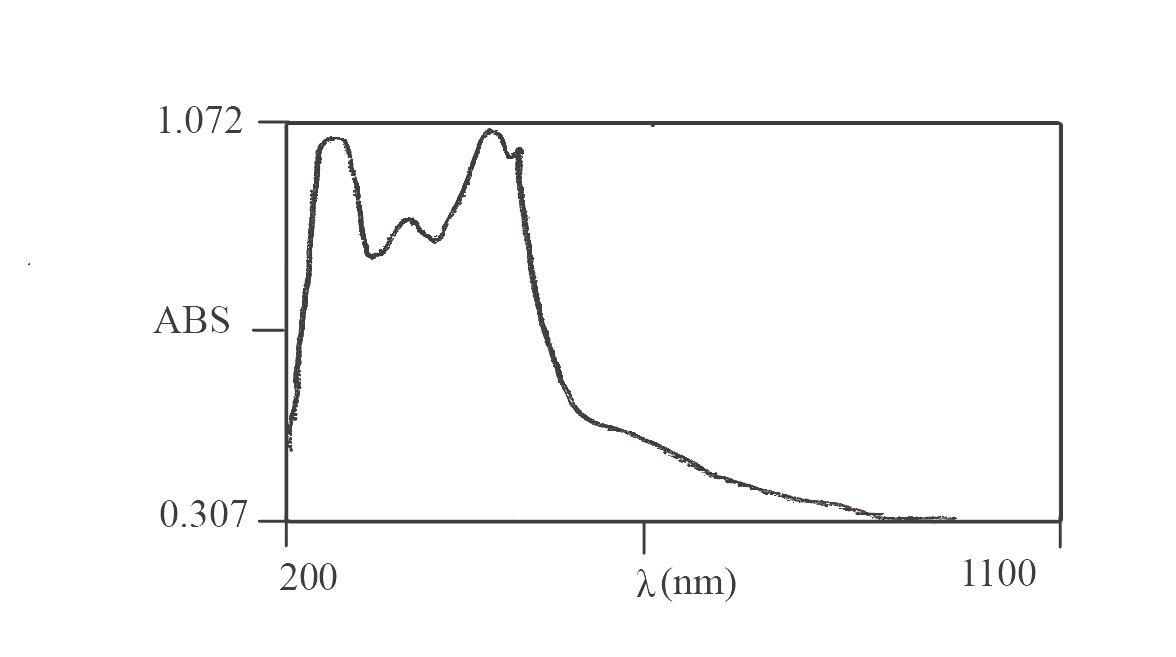


**7a**

**Figure S 10:** The UV spectra of the copper(II) complexes **5c, 7a.**


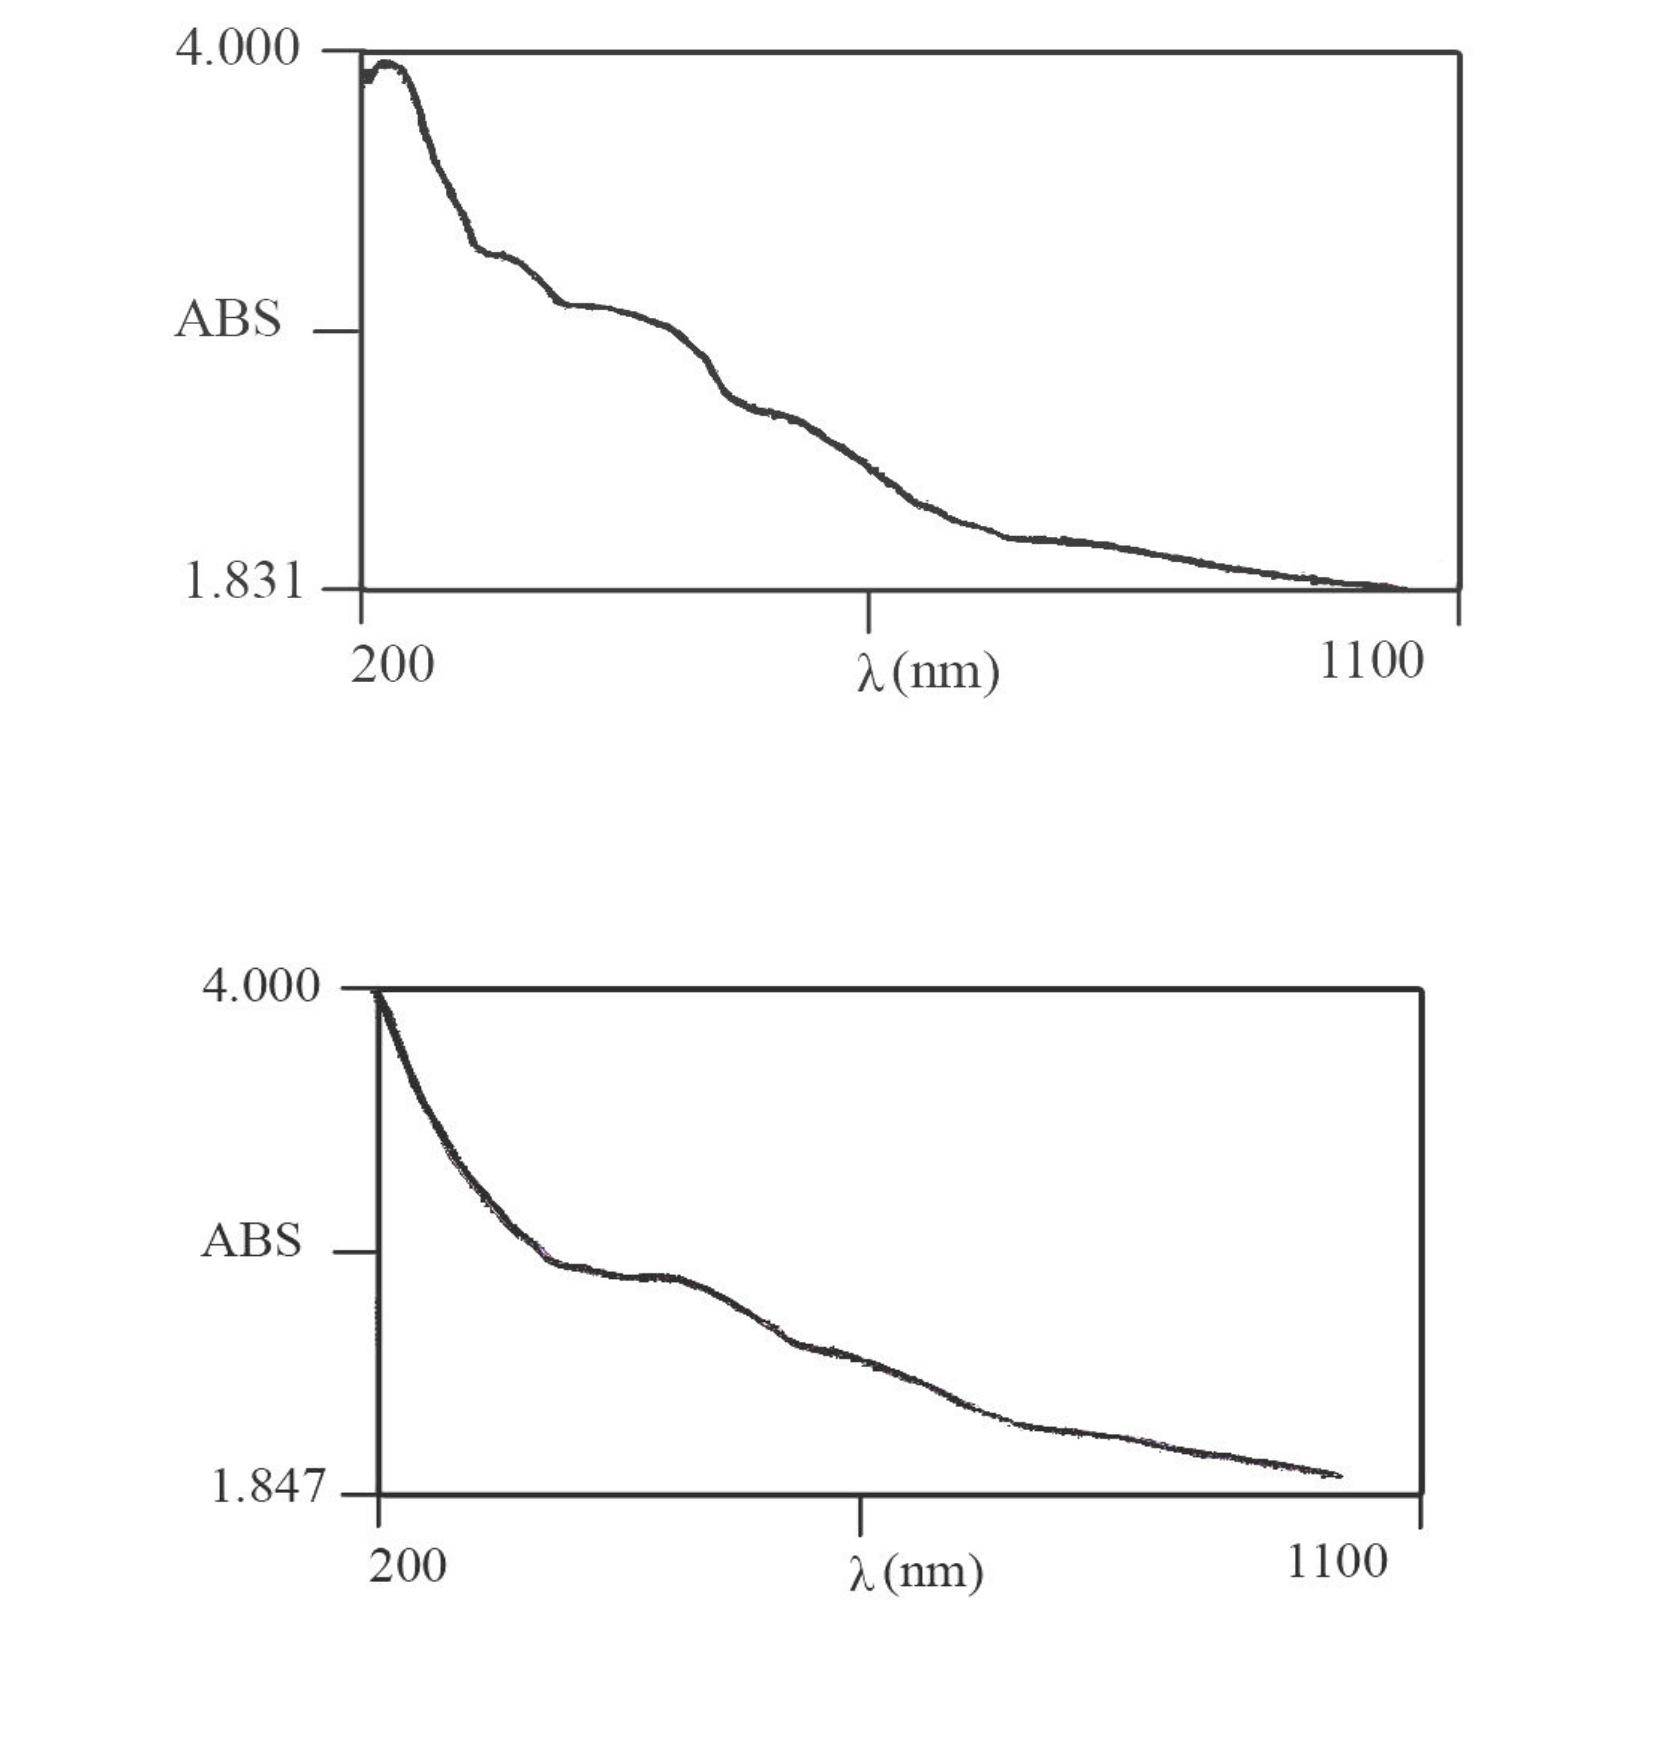


**7b**

**7c**

**Figure S 11:** The UV spectra of the copper(II) complexes **7b, 7c**.


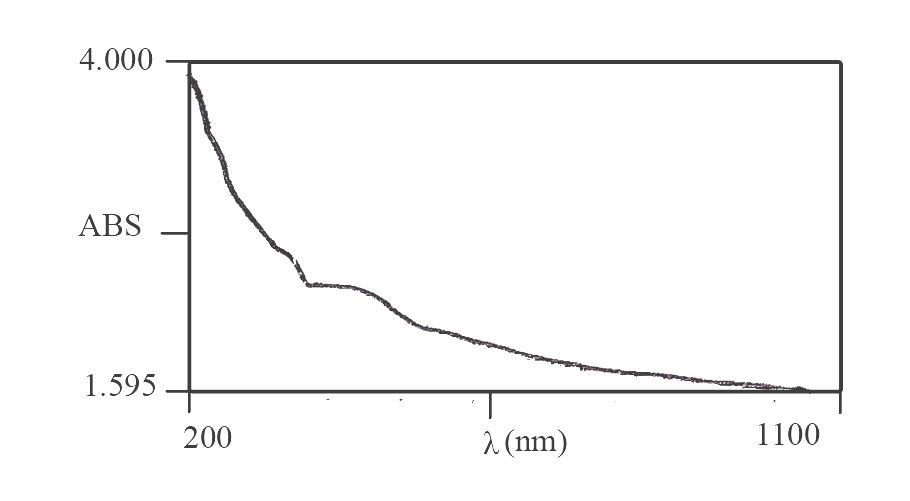


**7d**

**Figure S 12:** The UV spectra of the copper(II) complex **7d**.


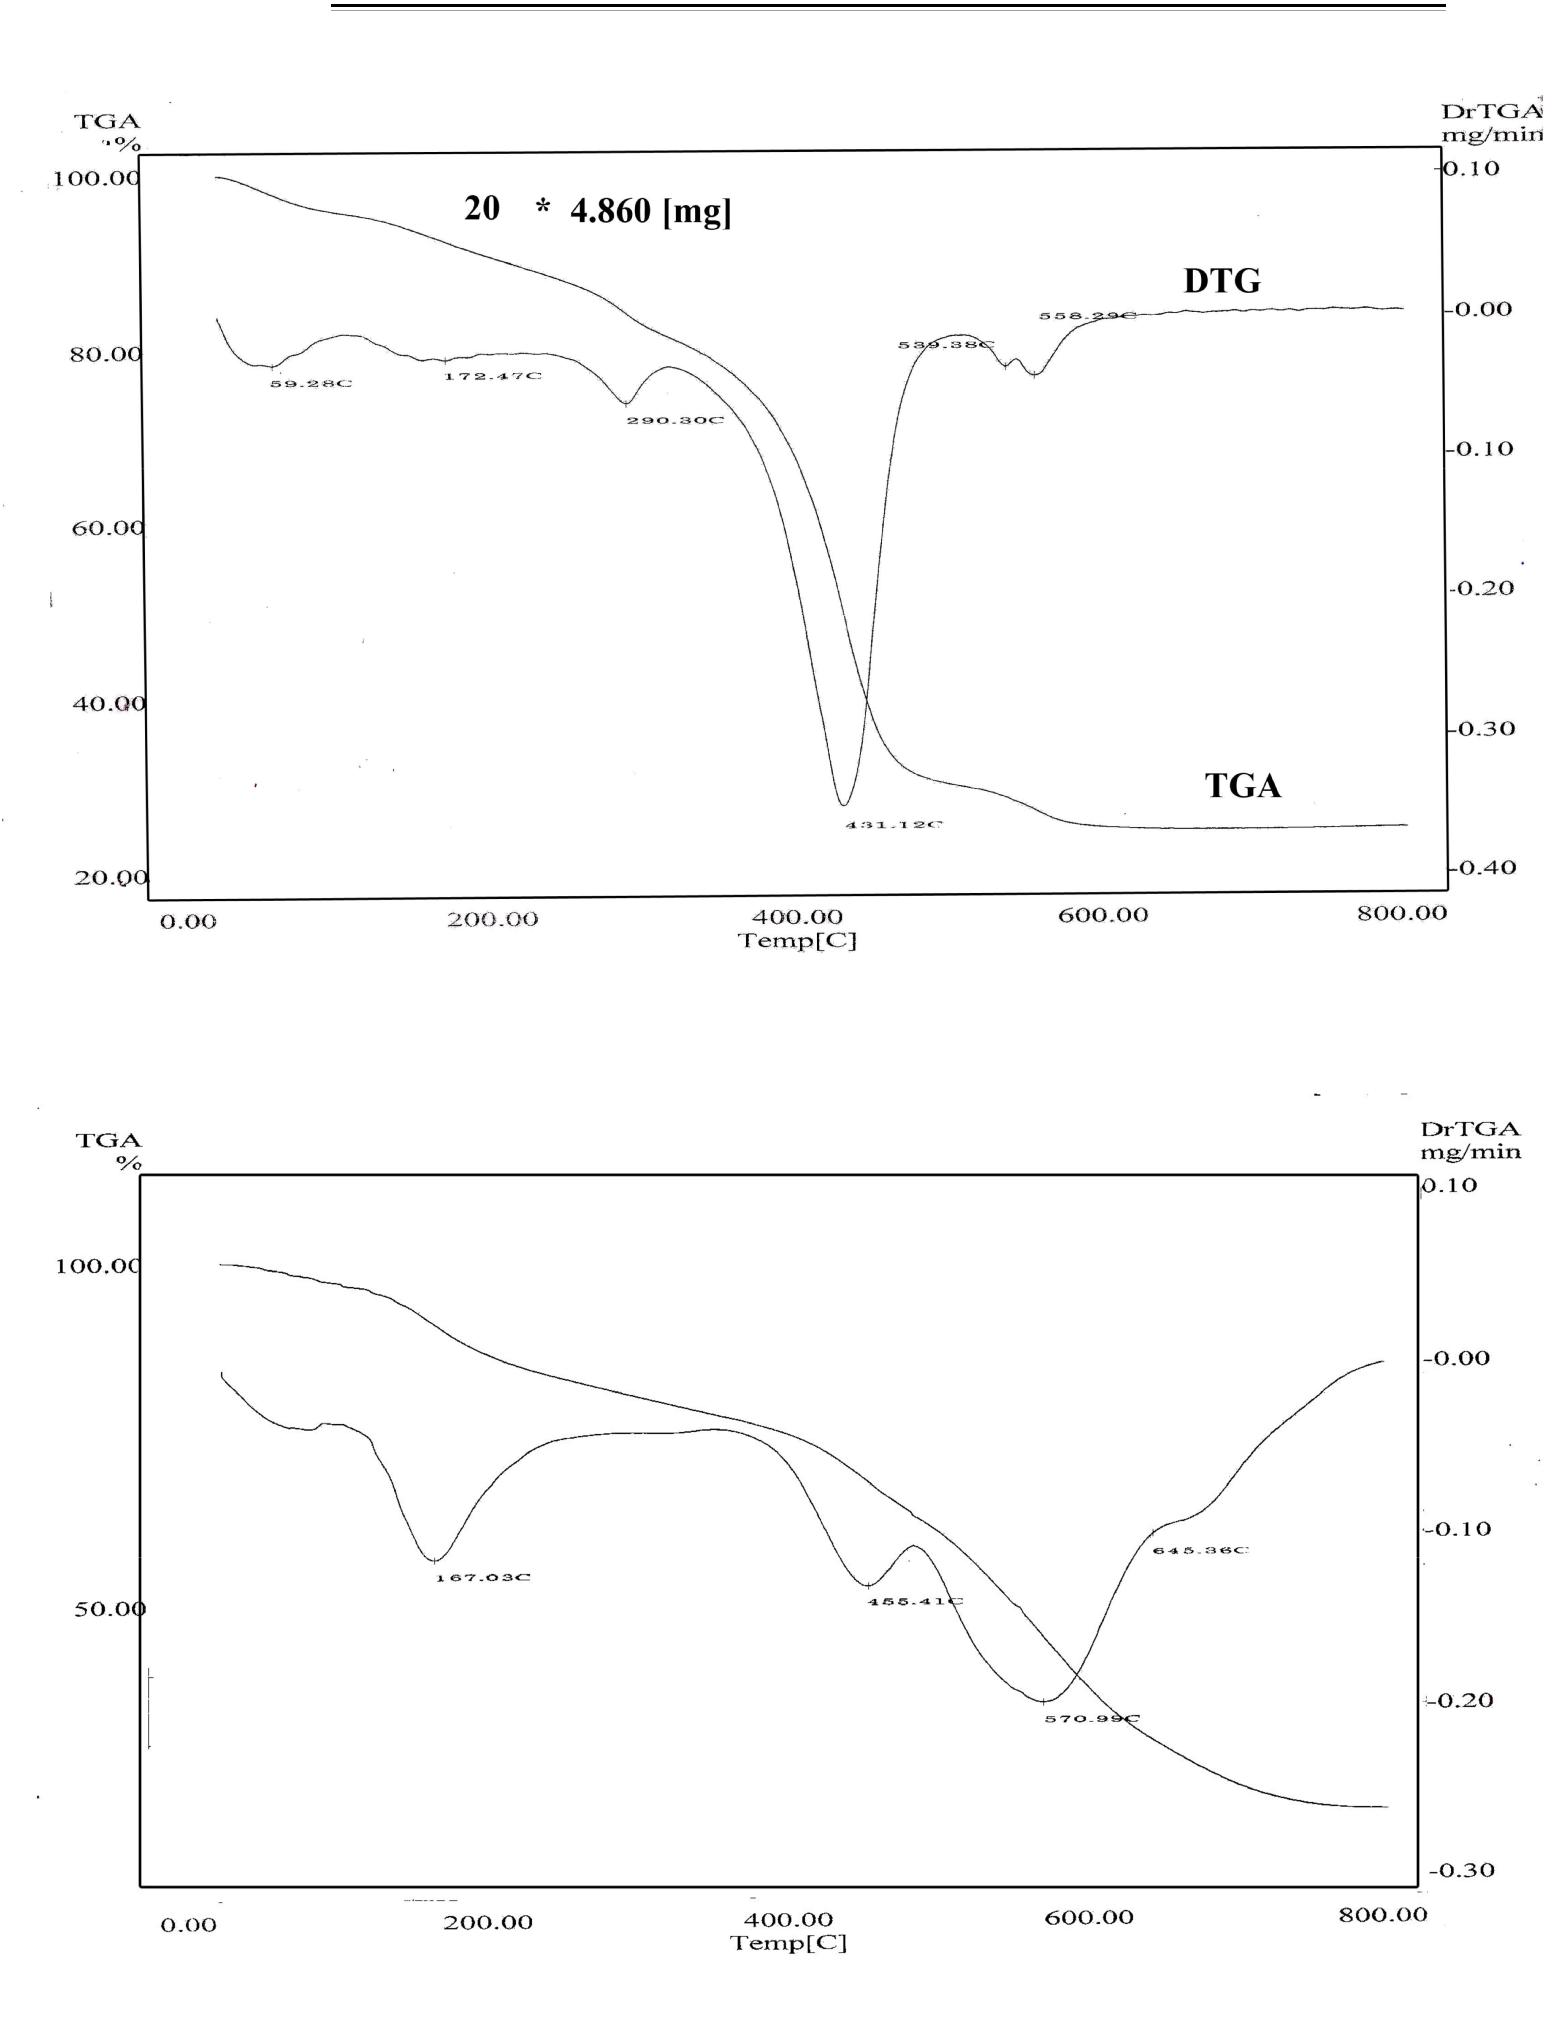


**5a**

**5b**

**Figure S 13:** TG/ DTG curve of the copper(II) complexes **5a, 5b**.


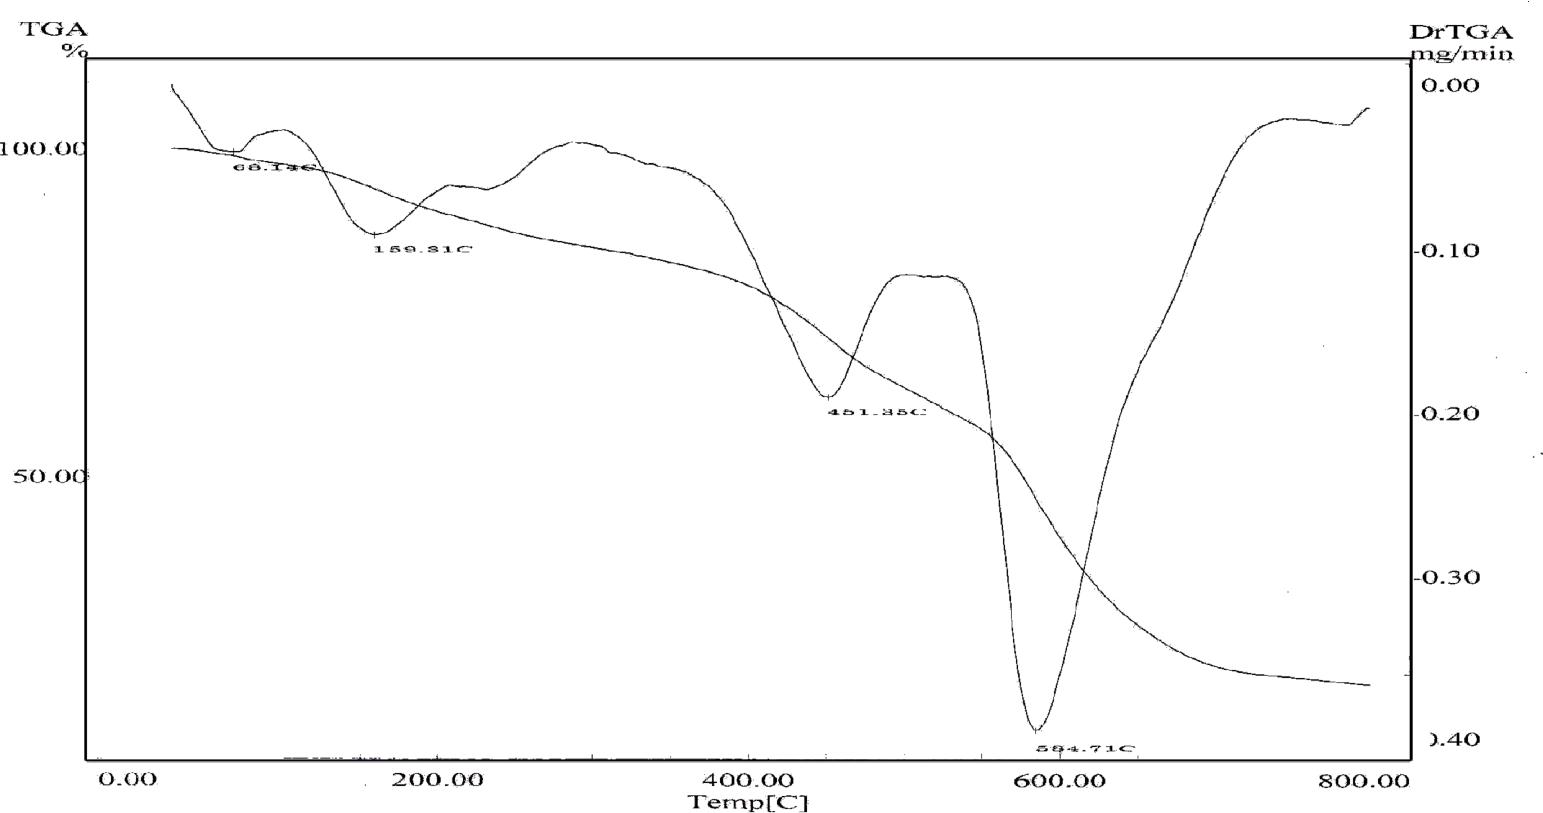


**5c**


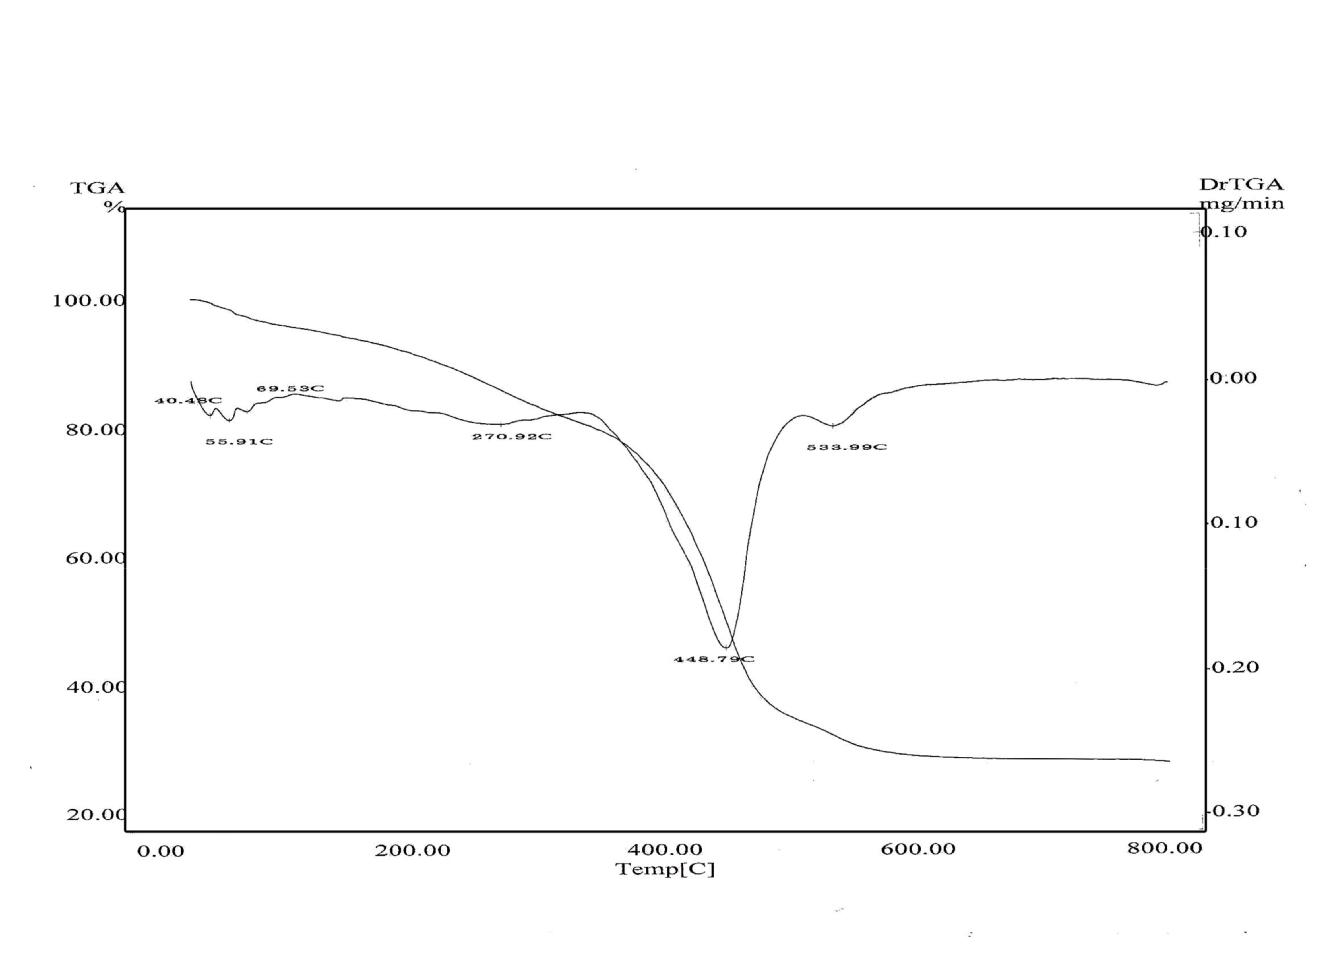


**7a**

**Figure S 14:** TG/ DTG curve of the copper(II) complexes **5c, 7a**.


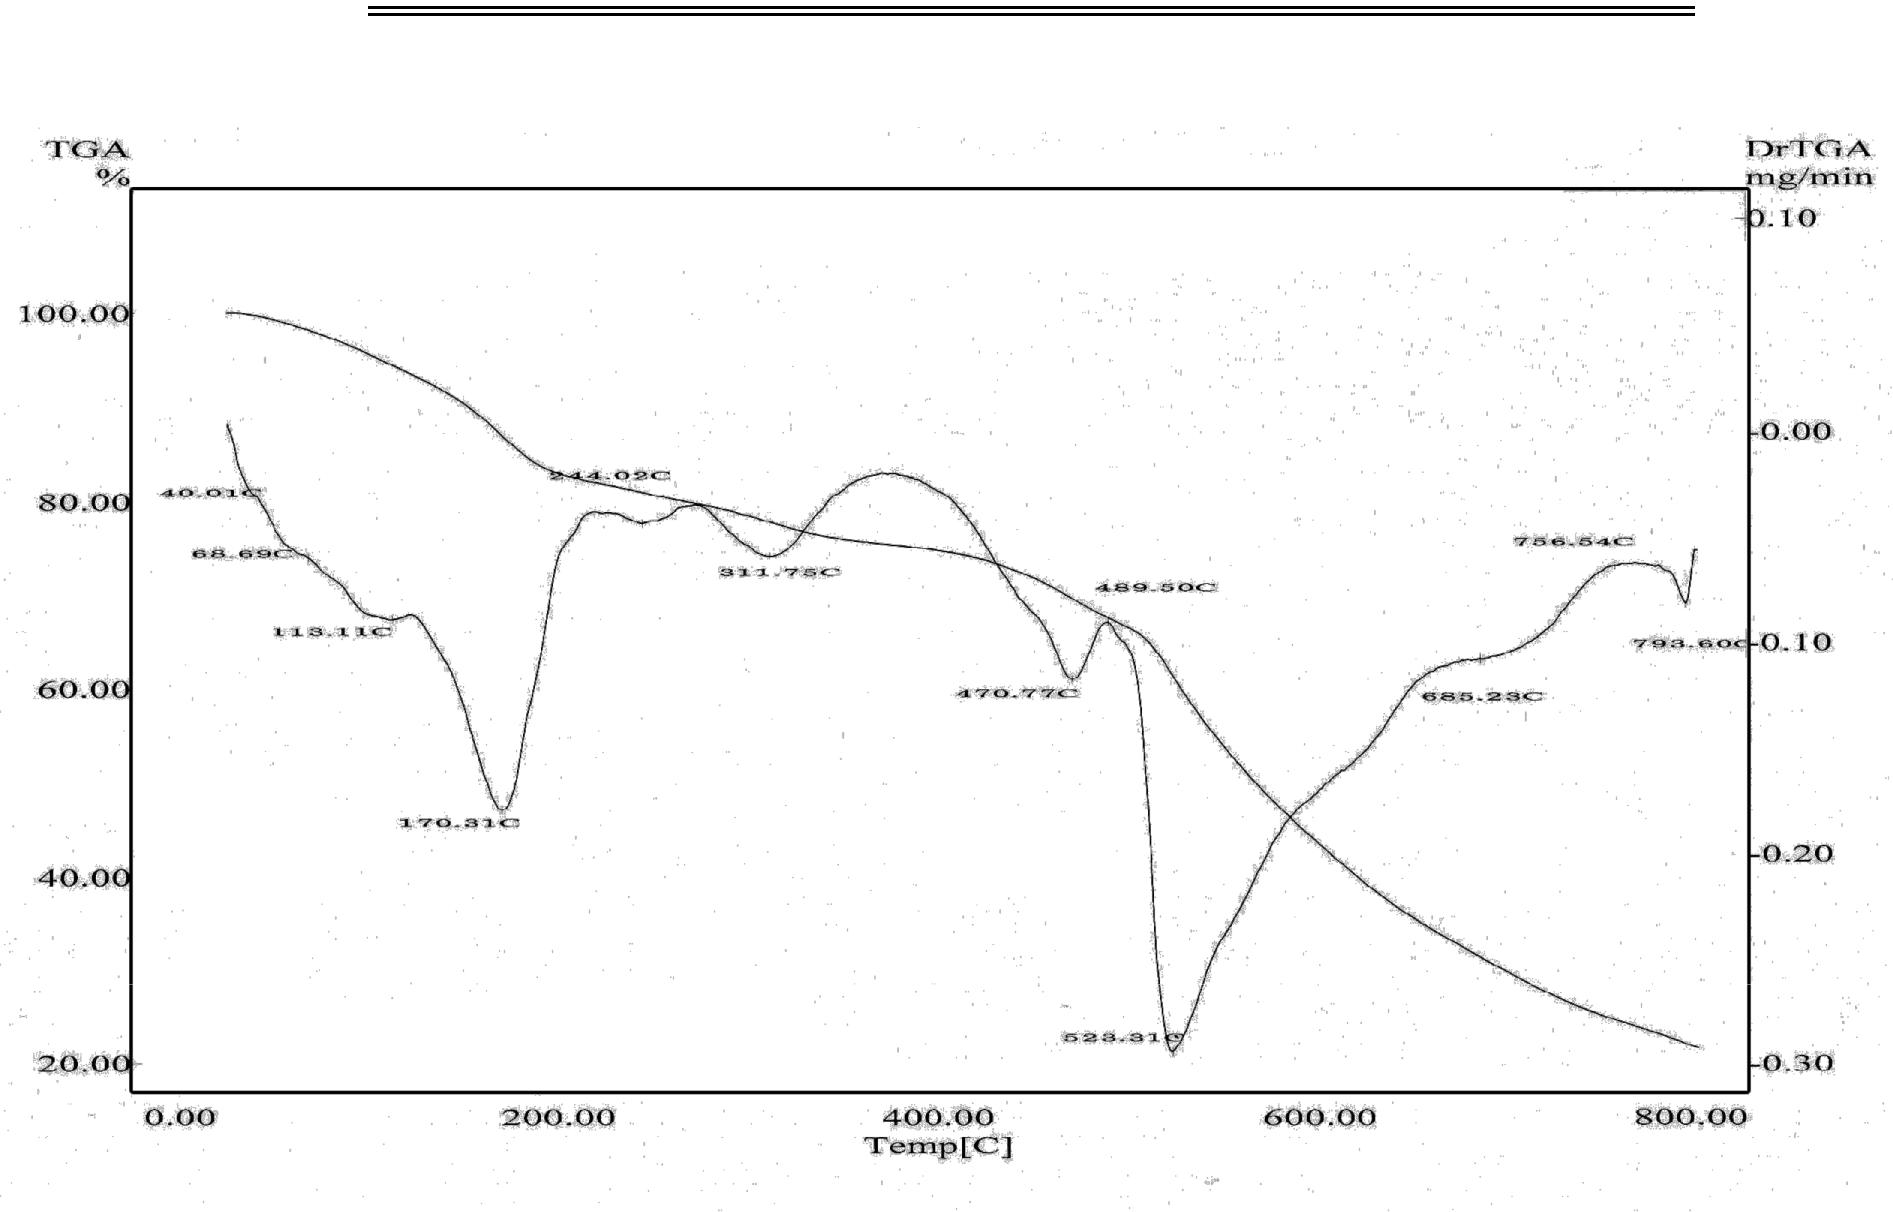


**7b**


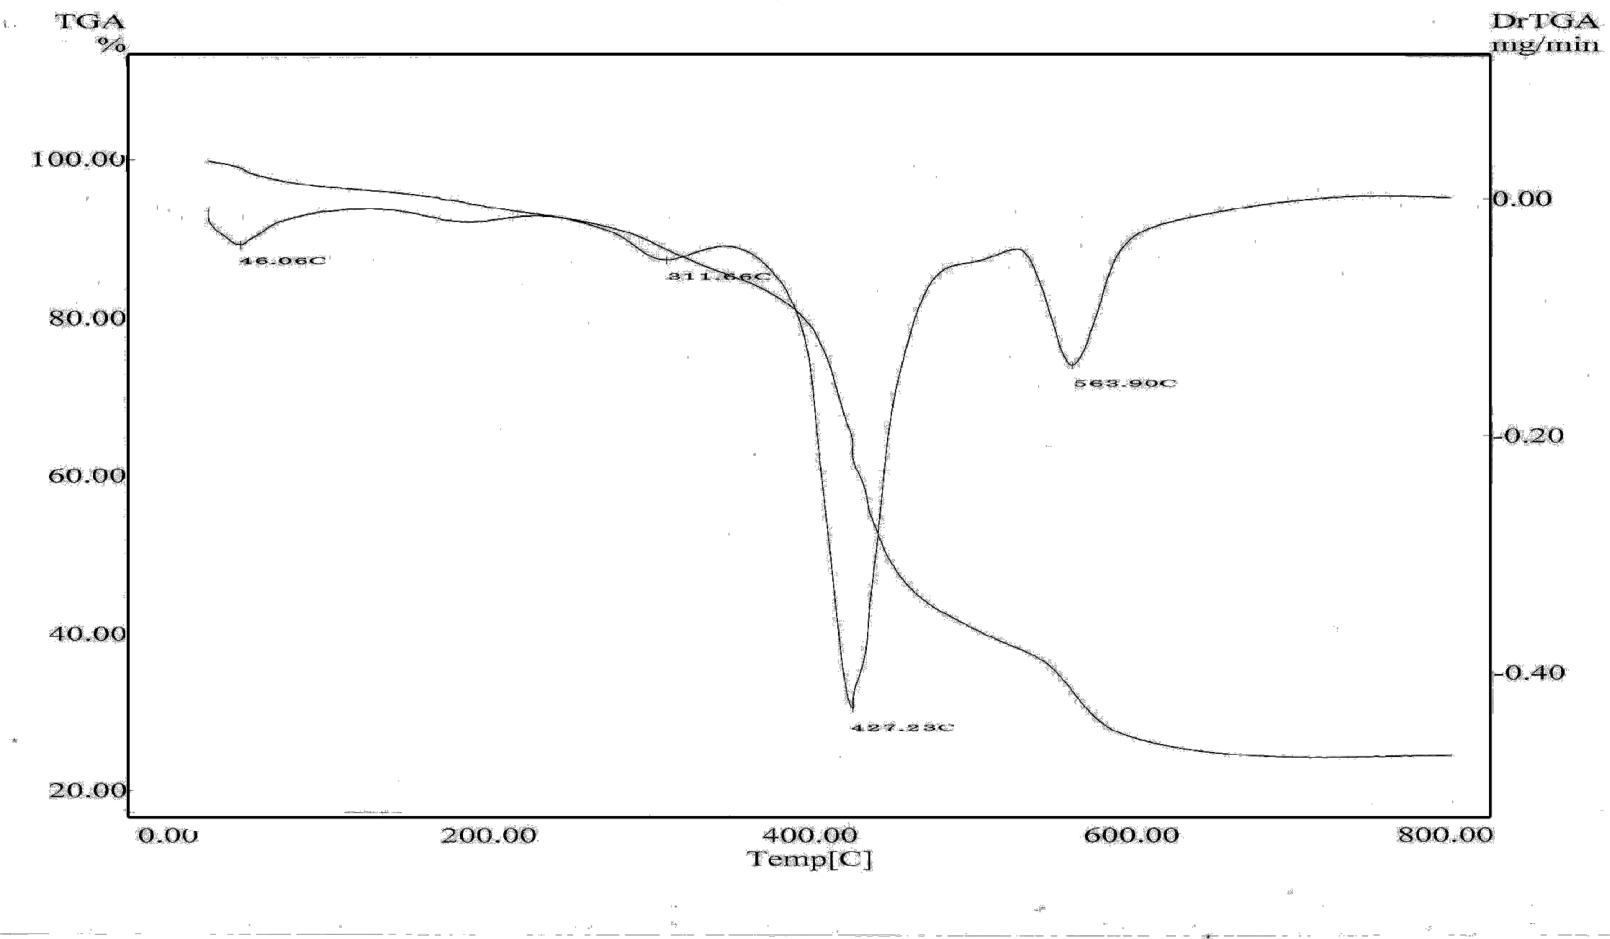


**7d**

**Figure S 15:** TG/ DTG curve of the copper(II) complexes **7b, 7d**.
